# Supplementary material
Source: Research Square preprint supplement (doi:10.21203/rs.3.rs-8964418/v1)
Supplement: Supplementary file 1 [file 86558c48acd7e0cd727b1eef.docx]

**Table 1** Comparison of baseline characteristics and surgical outcomes between the modified and control groups

| **Item** | **Treatment Group (n=10)** | **Control Group (n=30)** | **Statistic** | **P-value** |
| --- | --- | --- | --- | --- |
| **Demographics** |  |  |  |  |
| Gender (Male/Female) | 9/1 (90.0/10.0) | 26/4 (86.7/13.3) | — | 1.000 |
| Age (years) | 53.2 ± 18.5 | 54.6 ± 12.1 |  | 0.828 |
| **Surgical Parameters** |  |  |  |  |
| Combined Posterior Approach (Yes/No) | 0/10 (0/100) | 4/26 (13.3/86.7) | — | 0.556 |
| Operation Time (minutes) | 239.3 ± 109.3 | 311.3 ± 83.6 |  | 0.082 |
| Number of Radiographs | 16.4 ± 2.1 | 31.1 ± 3.7 |  | **<0.001** |
| **Reduction & Imaging Outcomes** |  |  |  |  |
| Quality of Fracture Reduction |  |  | — | 0.053 |
| · Anatomical Reduction | 8 (80.0) | 13 (43.3) |  |  |
| · Satisfactory Reduction | 2 (20.0) | 14 (46.7) |  |  |
| · Unsatisfactory Reduction | 0 (0) | 3 (10.0) |  |  |
| **Postoperative Recovery** |  |  |  |  |
| Time to First Ambulation (days) | 43.5 ± 3.5 | 51.0 ± 15.2 |  | 0.068 |
| Merle d'Aubigné Score (points) | 17.8 ± 0.4 | 16.5 ± 1.3 |  | **0.001** |
